# Supplementary material for: HENNOVATION: Learnings from Promoting Practice-Led Multi-Actor Innovation Networks to Address Complex Animal Welfare Challenges within the Laying Hen Industry
Source: MDPI journal article supplement (doi:10.3390/ani9010024), 2019-01-11
Supplement: s1 [file s1]

**Table S1.** Level of engagement / activity within each of the 19 networks as perceived by the network's facilitator during the final workshop (May 2017).

|                                                                                                                                                        | Not completed   | Low             | Moderate        | High            |
|--------------------------------------------------------------------------------------------------------------------------------------------------------|-----------------|-----------------|-----------------|-----------------|
| <b>General indicators relevant to the function of each network</b>                                                                                     |                 |                 |                 |                 |
| 0.1 Level of participant enthusiasm and energy of the network                                                                                          | 0               | 1               | 4               | 14              |
| 0.2 Level of participant trust and knowledge sharing within the network                                                                                | 0               | 1               | 4               | 14              |
| 0.3 Level of facilitators intervention (rate of intervention facilitator)                                                                              | 0               | 7               | 8               | 4               |
| 0.4 Level or frequency of interaction with support actors (engagement of the relevant actor at the right time)                                         | 0               | 5               | 6               | 8               |
| <i>Overall general engagement</i>                                                                                                                      | <b>0 (0%)</b>   | <b>14 (18%)</b> | <b>22 (29%)</b> | <b>40 (53%)</b> |
| <b>Step 1 Problem identification</b>                                                                                                                   |                 |                 |                 |                 |
| 1.1 Level of clarity of purpose and shared objective as a network                                                                                      | 0               | 0               | 4               | 15              |
| 1.2 Level of agreement on network function (e.g. decision making, common rules, reaching consensus etc.)                                               | 0               | 2               | 4               | 13              |
| 1.2 Degree to which the problem identified was based on shared need (common problem)                                                                   | 0               | 1               | 5               | 13              |
| 1.3 Market or other actors value the problem (relevance)                                                                                               | 0               | 0               | 3               | 16              |
| 1.4 Capacity of network to find practical solutions to the problem identified (perceived capacity of the network by the facilitator)                   | 0               | 1               | 6               | 12              |
| <i>Overall engagement in step 1</i>                                                                                                                    | <b>0 (0%)</b>   | <b>4 (4%)</b>   | <b>22 (23%)</b> | <b>69 (73%)</b> |
| <b>Step 2 Generation of ideas</b>                                                                                                                      |                 |                 |                 |                 |
| 2.1 Level of which the idea/solution is shared by the network                                                                                          | 0               | 1               | 3               | 15              |
| 2.2 Feasibility of the idea (includes financially viable, based on ADAS tool)                                                                          | 10              | 0               | 4               | 5               |
| 2.3 Level of diversity of knowledge (resources) used: science, advisor's input, practical experience etc.                                              | 0               | 2               | 3               | 14              |
| 2.4 Capacity of network to trial the practical solutions selected (perceived capacity of the network by the facilitator)                               | <b>0</b>        | <b>1</b>        | <b>4</b>        | <b>14</b>       |
| <i>Overall engagement in step 2</i>                                                                                                                    | <b>10 (13%)</b> | <b>4 (5%)</b>   | <b>14 (18%)</b> | <b>48 (63%)</b> |
| <b>Step 3 Action planning &amp; resource mobilization</b>                                                                                              |                 |                 |                 |                 |
| 3.1 Robustness of innovation action planning including time-frame and task division (everyone knows what is happening, when and by whom)               | 2               | 4               | 4               | 9               |
| 3.2 Level of clarity on anticipated result (research question) and system or criteria in place for to measure and monitor the results (e.g. viability) | 1               | 1               | 9               | 8               |
| 3.3 Level of resources the members within the network commit towards trialling.                                                                        | 1               | 4               | 7               | 7               |
| 3.4 Level of external support (whether scientific, from industry or technical)                                                                         | 1               | 4               | 5               | 9               |
| <i>Overall engagement in step 3</i>                                                                                                                    | <b>5 (7%)</b>   | <b>13 (17%)</b> | <b>25 (33%)</b> | <b>33 (43%)</b> |
| <b>Step 4 Practical trialing and development</b>                                                                                                       |                 |                 |                 |                 |
| 4.1 Level and rate of innovation - action plan leads to action.                                                                                        | 5               | 1               | 4               | 9               |

|                                             |                                                                                                     |                 |               |                |                 |
|---------------------------------------------|-----------------------------------------------------------------------------------------------------|-----------------|---------------|----------------|-----------------|
| 4.2                                         | Willingness to discuss and share within the network successes and failures (to learn from failures) | 4               | 2             | 3              | 10              |
| <i>Overall engagement in step 4</i>         |                                                                                                     | <b>9 (24%)</b>  | <b>3 (8%)</b> | <b>7 (18%)</b> | <b>19 (50%)</b> |
| <b>Step 5 Implementation and up-scaling</b> |                                                                                                     |                 |               |                |                 |
| 5.1                                         | Level of satisfaction of members with regard to relevance and affordability of solutions developed. | 9               | 0             | 1              | 9               |
| 5.2                                         | Number of network members applying the innovation as common practice across their farm.             | 14              | 0             | 2              | 3               |
| 5.3                                         | Network members' pride of what they achieved (wanting to share and scale -up the innovative idea).  | 9               | 1             | 0              | 9               |
| <i>Overall engagement in step 5</i>         |                                                                                                     | <b>32 (56%)</b> | <b>1 (2%)</b> | <b>3 (5%)</b>  | <b>21 (37%)</b> |
| <b>Step 6 Dissemination</b>                 |                                                                                                     |                 |               |                |                 |
| 6.1                                         | Network has actively sought to disseminate innovation beyond network members                        | 12              | 2             | 1              | 4               |
| 6.2                                         | Innovation has been subsequently adopted by other actors and bodies                                 | 19              | 0             | 0              | 0               |
| <i>Overall engagement in step 6</i>         |                                                                                                     | <b>31 (82%)</b> | <b>2 (5%)</b> | <b>1 (3%)</b>  | <b>4 (11%)</b>  |
